# Supplementary material for: The Water Insecurity Experiences (WISE) Scales are suitable for use in high-income settings: findings from cognitive interviews and nationally representative surveys
Source: Research Square preprint supplement (doi:10.21203/rs.3.rs-6917162/v1), 2025-06-23
Supplement: Supplementary file 1 [file 7246ce7f3015ac0be3913de9.docx]

**Supplementary Table 1.** Complete Individual Water Insecurity Experiences Scale item phrasing.

**
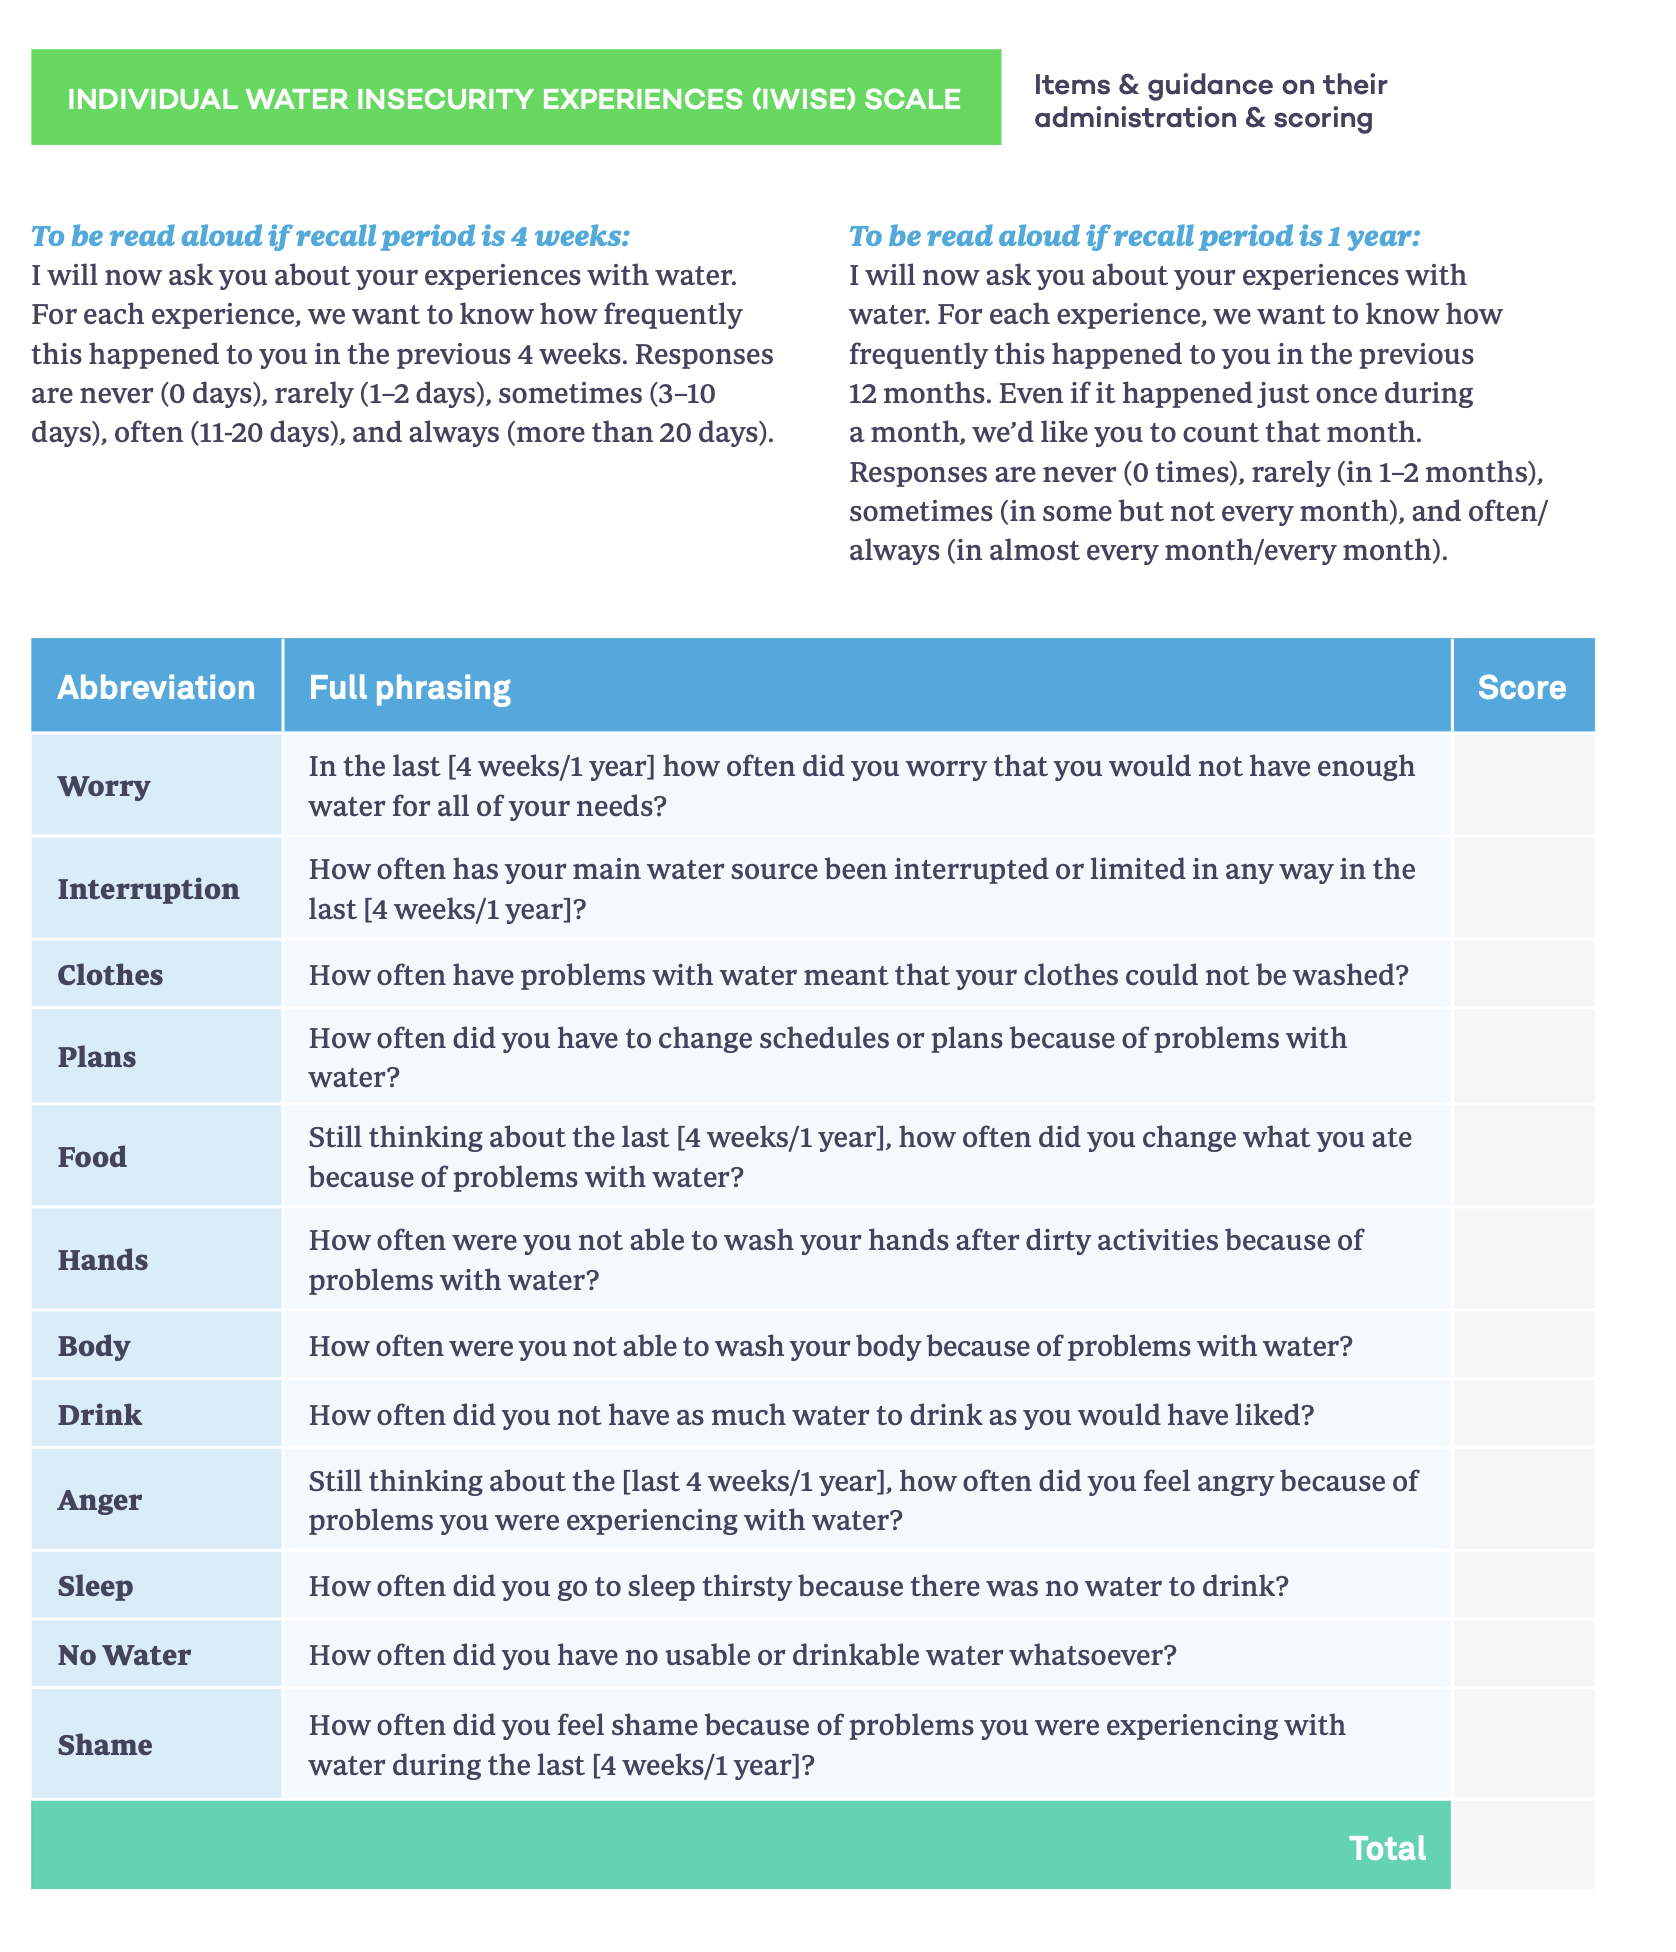
**

**
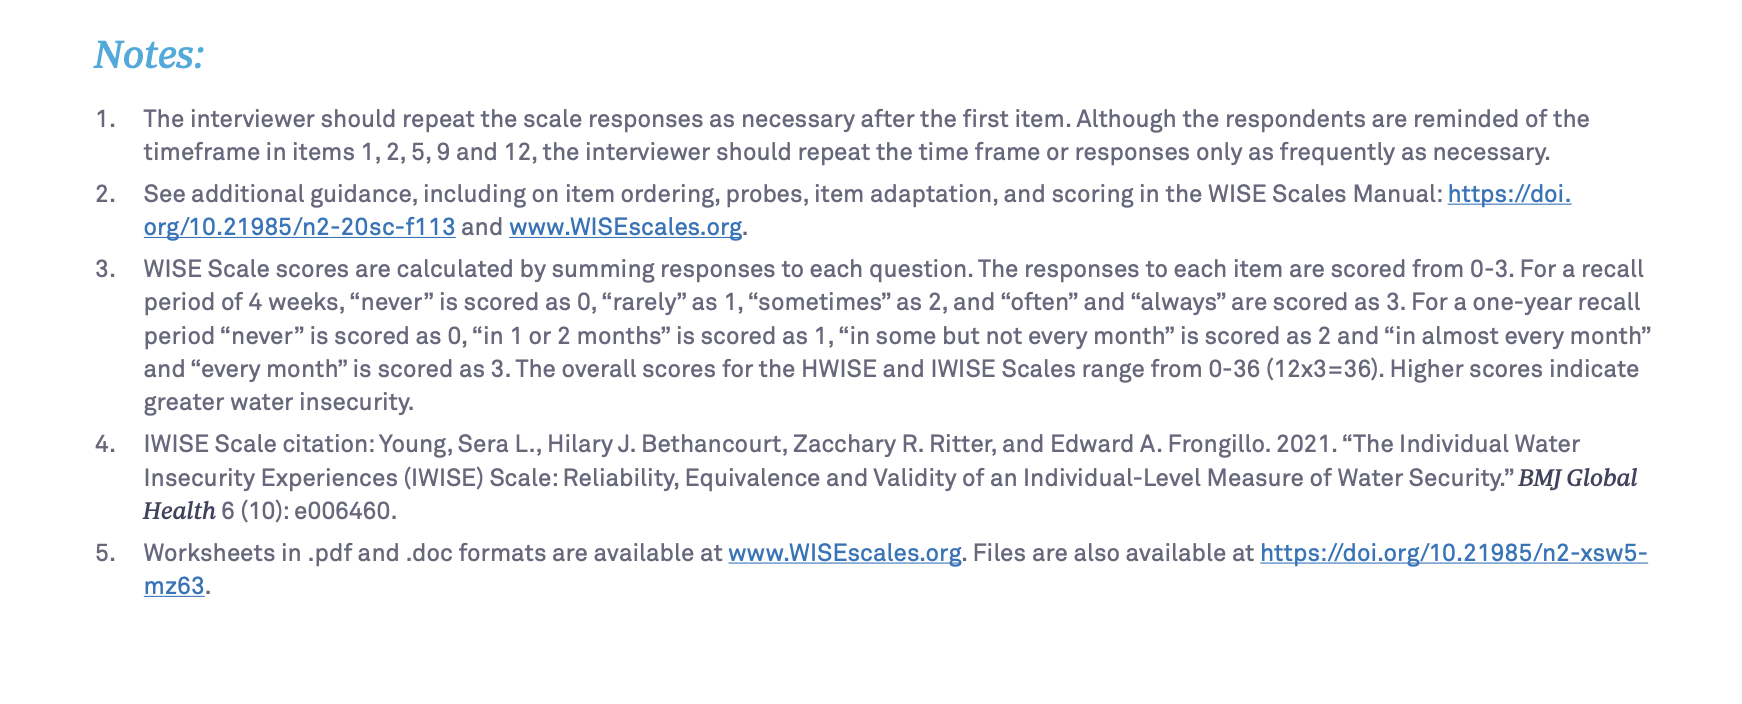
**

**Supplementary Tables 2-8.** Pairwise assessment of measurement invariance of Individual Water Insecurity Experiences data, comparing two high-income countries (Australia and USA) to three low- and middle-income countries (Bangladesh, Brazil, and Uganda) in the Gallup World Poll (n=4,928).

| **Table 2. USA & Bangladesh*** | | |
| --- | --- | --- |
|  | **Configural invariance** | **Scalar invariance** |
| **RMSEA (<0.06)** | 0.046 | 0.048 |
| **Upper RMSEA 90% CI (<0.06)** | 0.052 | 0.053 |
| **CFI (>0.95)** | 0.997 | 0.995 |
| **TLI (>0.95)** | 0.996 | 0.996 |
| **SRMR (<0.08)** | 0.035 | 0.038 |

| **Table 3. USA & Brazil*** | | |
| --- | --- | --- |
|  | **Configural invariance** | **Scalar invariance** |
| **RMSEA (<0.06)** | 0.055 | 0.061 |
| **Upper RMSEA 90% CI (<0.06)** | 0.060 | 0.066 |
| **CFI (>0.95)** | 0.983 | 0.973 |
| **TLI (>0.95)** | 0.980 | 0.975 |
| **SRMR (<0.08)** | 0.048 | 0.053 |

| **Table 4. USA & Uganda*** | | |
| --- | --- | --- |
|  | **Configural invariance** | **Scalar invariance** |
| **RMSEA (<0.06)** | 0.060 | 0.051 |
| **Upper RMSEA 90% CI (<0.06)** | 0.065 | 0.056 |
| **CFI (>0.95)** | 0.980 | 0.981 |
| **TLI (>0.95)** | 0.976 | 0.982 |
| **SRMR (<0.08)** | 0.039 | 0.043 |

| **Table 5. Australia & Bangladesh*** | | |
| --- | --- | --- |
|  | **Configural invariance** | **Scalar invariance** |
| **RMSEA (<0.06)** | 0.040 | 0.037 |
| **Upper RMSEA 90% CI (<0.06)** | 0.046 | 0.042 |
| **CFI (>0.95)** | 0.998 | 0.997 |
| **TLI (>0.95)** | 0.997 | 0.998 |
| **SRMR (<0.08)** | 0.050 | 0.049 |

| **Table 6. Australia & Brazil*** | | |
| --- | --- | --- |
|  | **Configural invariance** | **Scalar invariance** |
| **RMSEA (<0.06)** | 0.047 | 0.049 |
| **Upper RMSEA 90% CI (<0.06)** | 0.052 | 0.053 |
| **CFI (>0.95)** | 0.986 | 0.981 |
| **TLI (>0.95)** | 0.983 | 0.982 |
| **SRMR (<0.08)** | 0.060 | 0.069 |

| **Table 7. Australia & Uganda*** | | |
| --- | --- | --- |
|  | **Configural invariance** | **Scalar invariance** |
| **RMSEA (<0.06)** | 0.050 | 0.043 |
| **Upper RMSEA 90% CI (<0.06)** | 0.055 | 0.048 |
| **CFI (>0.95)** | 0.984 | 0.985 |
| **TLI (>0.95)** | 0.981 | 0.986 |
| **SRMR (<0.08)** | 0.053 | 0.062 |

| **Table 8. USA & Australia*** | | |
| --- | --- | --- |
|  | **Configural invariance** | **Scalar invariance** |
| **RMSEA (<0.06)** | 0.037 | 0.029 |
| **Upper RMSEA 90% CI (<0.06)** | 0.043 | 0.034 |
| **CFI (>0.95)** | 0.988 | 0.990 |
| **TLI (>0.95)** | 0.985 | 0.991 |
| **SRMR (<0.08)** | 0.054 | 0.060 |

a Values in parentheses indicate suggested parameters; red shading indicates estimates outside the parameter.

RMSEA: root mean square error of approximation; CI: confidence interval; CFI: comparative fit index; TLI: Tucker-Lewis index; SRMR: standardized root mean square residual

**Supplementary Table 9.** Individual Water Insecurity Experiences Scale scores were associated with lower wealth and household size in US and Australia (Gallup World Poll 2022, n=1,992).a

|  | **IWISE score** | | |
| --- | --- | --- | --- |
|  | Coefficient | 95% CI | *p* |
| **Wealth quintile** (ref: high) |  |  |  |
| Mid-high | 0.13 | (-0.14, 0.39) | 0.035 |
| Middle | 0.37 | (0.04, 0.70) | 0.026 |
| Mid-low | 0.51 | (0.17, 0.84) | 0.003 |
| Low | 1.11 | (0.58, 1.63) | <0.001 |
| **Difficult getting by on income** (ref: getting by on income) | 2.21 | (1.55, 2.87) | <0.001 |
| **Number of household members** | 0.13 | (0.03, 0.23) | 0.013 |

a Each model includes the exposure of interest and adjusts for site and the complex sampling strategy (to ensure proper standard errors).

CI: confidence interval
